# Supplementary material for: Synthesis of DNA-guided silver nanoparticles on a graphene oxide surface: enhancing the antibacterial effect and the wound healing activity
Source: Royal Society of Chemistry journal article supplement (doi:10.1039/c8ra04933e), 2018-01-01
Supplement: c8ra04933e1.pdf [file c8ra04933e1.pdf]

## Supporting Information

### Synthesis of DNA-guided silver nanoparticle on the graphene oxide surface: enhanced the antibacterial effect and the wound healing activity

Chunyi Tong<sup>1#</sup>, Wei Zou<sup>2#</sup>, Weimin Ning<sup>1#</sup>, Jialong Fan<sup>1</sup>, Li Li<sup>1</sup>, Bin Liu<sup>1\*</sup>, Xuanming Liu<sup>1\*</sup>

<sup>1</sup>College of Biology, Hunan Province Key Laboratory of Plant Functional Genomics and Developmental Regulation, Hunan University, Changsha, 410082, PR China

<sup>2</sup>Key Laboratory of Hunan Provincial TCM Administration for TCM in Obstetrics & Gynecology, Hunan Provincial Maternal and Child Health Care Hospital, Changsha 410008, PR China

# These authors contributed equal to this work and were co-first authors.

\* To whom correspondence should be addressed. Tel: +86 731 89720939; Fax: +86 731 89720939;

E-mail: binliu2001@hotmail.com (B. Liu); xml05@hnu.edu.cn (X Liu)

This corrected version, in which Fig. S7 has been corrected, replaces that published online 7<sup>th</sup> August 2018.

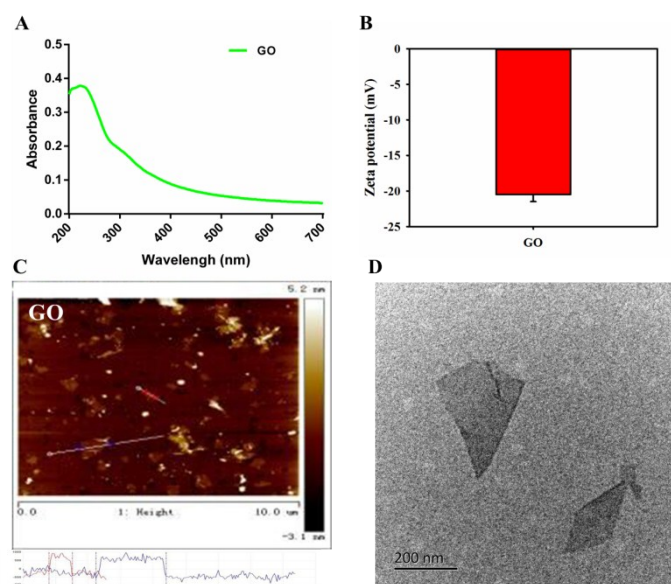

Fig.S1. (A) The UV-vis absorption spectra of GO. (B) The zeta potential of GO. (C) The Atomic force microscope of GO.

(D) The transmission electron microscope of GO.

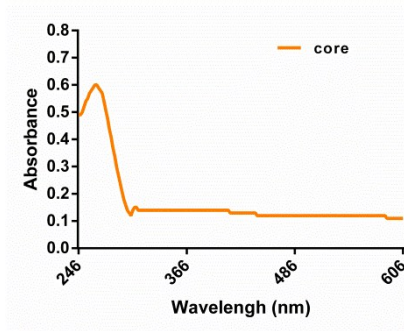

Fig.S2. The UV-vis absorption spectra of ssDNA (core).

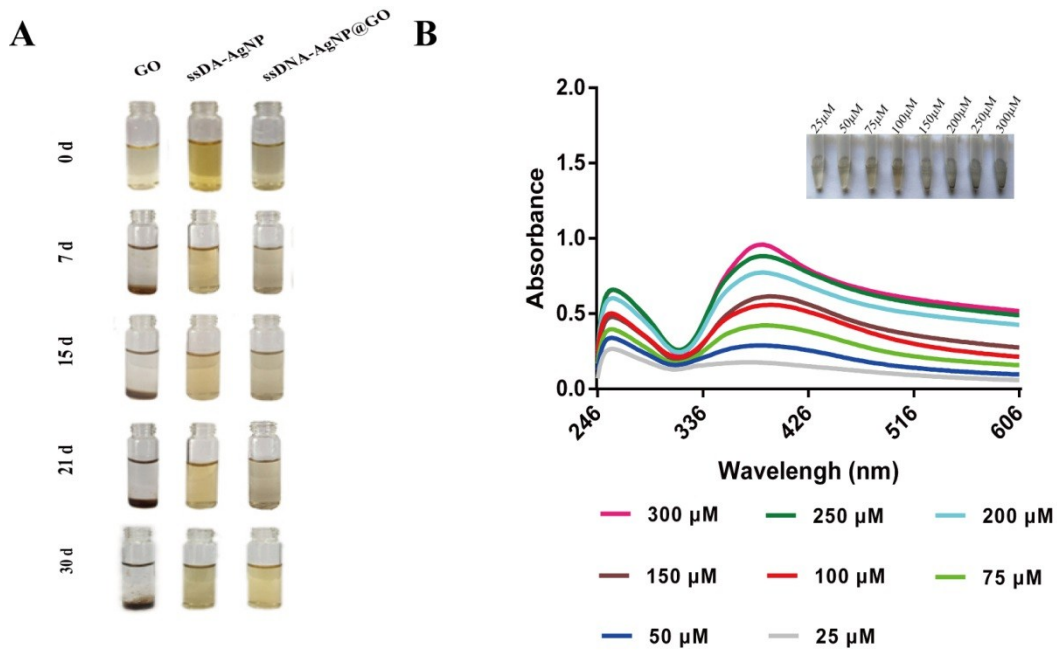

Fig.S3. (A) The dispersion stability of GO, ssDNA-AgNPs and ssDNA-AgNPs@GO. (B) The UV-vis absorption spectra of different concentrations ssDNA-AgNPs@GO.

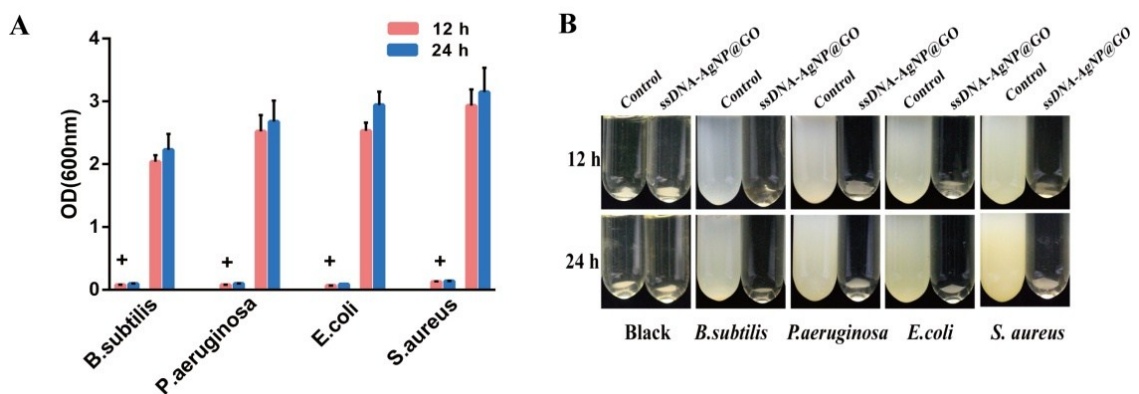

Fig.S4. Antibacterial activity of ssDNA-AgNPs@GO nanoparticles (A) Optical density at 600 nm of different bacterial suspensions treated and untreated with ssDNA-AgNPs@GO (+): *E. coli*, 6.8 μg/mL; *P. aeruginosa*, 6.8 μg/mL; *S. aureus*, 11.9 μg/mL; *B. subtilis*, 10.2 μg/mL. (B) LB liquid medium turbidity assays.

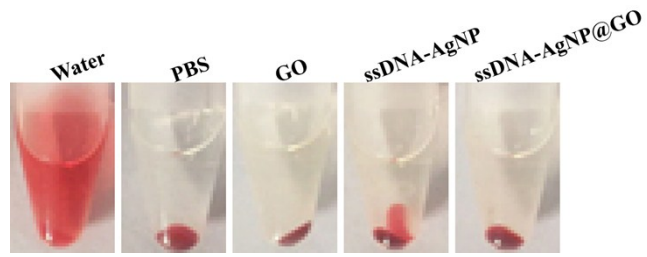

Fig.S5. Photographs of hemocytolysis with different treatment.

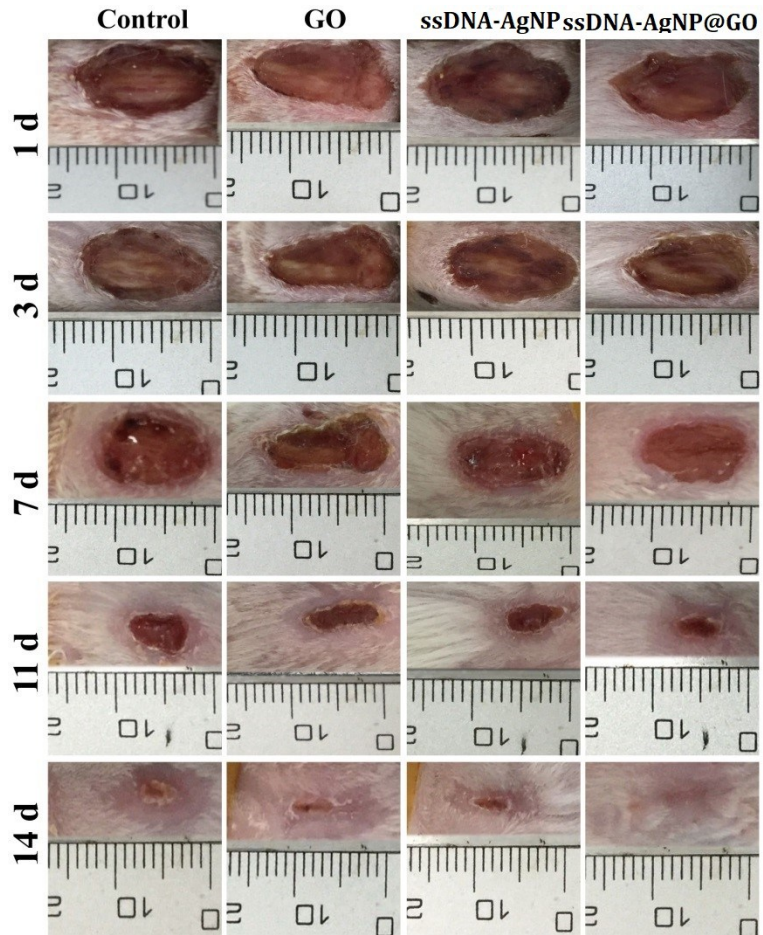

Fig.S6. Images of wound infection and healing following with different treatment for the indicated days.

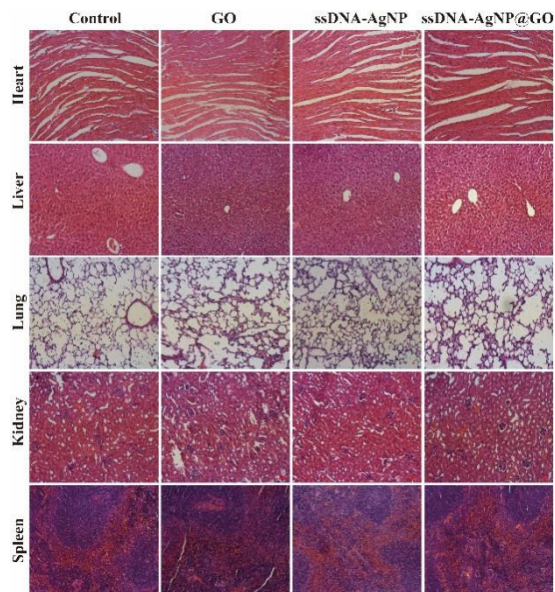

Fig.S7. Pathological study of the cytotoxic effect of ssDNA-AgNPs@GO. H&E staining of the heart, liver, lung, kidney and spleen tissue slices of different groups with treatment for 14 days .

**Table S1. Values of Minimum inhibitory concentration (MIC) for the two nanomaterials ( $\mu\text{g mL}^{-1}$ ) against bacteria**

| Bacteria             | ssDNA-AgNPs@GO | ssDNA-AgNPs |
|----------------------|----------------|-------------|
| <i>E. coli</i>       | 6.8            | 10.2        |
| <i>P. aeruginosa</i> | 6.8            | 10.2        |
| <i>B. subtilis</i>   | 10.2           | 11.9        |
| <i>S. aureus</i>     | 11.9           | 13.6        |
